# Supplementary material for: A population-based analysis of life satisfaction and social support among children of diverse backgrounds in British Columbia, Canada
Source: Springer Nature journal article supplement (doi:10.1007/s11136-018-1922-4), 2018-06-20
Supplement: MOESM1 [file 15863772]

**Appendix**: Pairwise comparison of model fit for MG-CFA analysis of the SWLS-C

|  |  |  | **Configural** | | **Metric** | | **Scalar** | | **Strict** | |
| --- | --- | --- | --- | --- | --- | --- | --- | --- | --- | --- |
| **Reference**  **Group** | **Focal**  **Group** | χ2  **(p value)** | **RMSEA**  **90% CI** | **CFI** | Δ χ2  **(p value)** | Δ  **CFI** | Δ χ2  **(p value)** | Δ  **CFI** | Δ χ2  **(p value)** | Δ  **CFI** |
| English | Cantonese | 95.48 (.00) | .034 (.028, .040) | .998 | 2.18 (.70) | .001 | 14.57 (.41) | .000 | 42.86 (.00) | .002 |
| English | Filipino | 97.47 (.00) | .035 (.029, .041) | .998 | 8.45 (.08) | .000 | 22.04 (.08) | .000 | 16.83 (.00) | .000 |
| English | Spanish | 101.46 (.00) | .036 (.030, .042) | .998 | 5.66 (.23) | .001 | 32.28 (.00) | .000 | .61 (.99) | .000 |
| English | French | 98.55 (.00) | .035 (.029, .041) | .998 | 2.03 (.73) | .001 | 14.35 (.42) | .000 | 7.98 (.16) | .000 |
| English | Korean | 108.92 (.00) | .037 (.031, .044) | .998 | 2.04 (.73) | .000 | 28.73 (.01) | .000 | 18.72 (.00) | .000 |
| English | Mandarin | 108.90 (.00) | .037 (.031, .043) | .998 | 1.84 (.76) | .001 | 18.92 (.17) | .000 | 34.91 (.00) | .002 |
| English | Punjabi | 92.36 (.00) | .034 (.028, .040) | .998 | 5.35 (.25) | .001 | 18.86 (.17) | .000 | 12.65 (.03) | .000 |
| Cantonese | Filipino | 25.53 (.00) | .038 (.020, .057) | .997 | 16.87 (.00) | .002 | 39.48 (.00) | .004 | 64.86 (.00) | .000 |
| Cantonese | Spanish | 17.28 (.07) | .028 (.000, .049) | .999 | 3.07 (.55) | .000 | 27.44 (.02) | .002 | 36.01 (.00) | .005 |
| Cantonese | French | 14.27 (.16) | .018 (.000, .038) | .999 | 3.31 (.51) | .001 | 15.48 (.35) | .000 | 54.62 (.00) | .008 |
| Cantonese | Korean | 19.39 (.04) | .032 (.008, .054) | .998 | 6.14 (.19) | .000 | 35.96 (.00) | .004 | 9.78 (.08) | .000 |
| Cantonese | Mandarin | 27.05 (.00) | .038 (.021, .055) | .998 | 1.78 (.78) | .001 | 25.19 (.03) | .001 | 10.21 (.07) | .001 |
| Cantonese | Punjabi | 15.65 (.11) | .023 (.000, .044) | .999 | 1.98 (.74) | .001 | 27.89 (.01) | .002 | 75.78 (.00) | **.016** |
| Filipino | Spanish | 29.04 (.00) | .051 (.030, .073) | .995 | 17.59 (.00) | .005 | 44.00 (.00) | .005 | 14.28 (.01) | .001 |
| Filipino | French | 26.43 (.00) | .040 (.022, .058) | .997 | 10.19 (.04) | .001 | 42.62 (.00) | .005 | 11.32 (.05) | .000 |
| Filipino | Korean | 31.27 (.00) | .056 (.340, .078) | .993 | 13.49 (.01) | .003 | 54.45 (.00) | **.012** | 41.71 (.00) | **n/a** |
| Filipino | Mandarin | 37.41 (.00) | .053 (.035, .071) | .995 | 19.50 (.00) | .002 | 47.64 (.00) | .005 | 66.83 (.00) | **.012** |
| Filipino | Punjabi | 26.86 (.00) | .044 (.024, .065) | .995 | 18.51 (.00) | .005 | 23.77 (.05) | .008 | 10.15 (.07) | .010 |
| Spanish | French | 18.22 (.05) | .029 (.000, .051) | .999 | 18.22 (.05) | .001 | 6.36 (.17) | .002 | 29.83 (.01) | .000 |
| Spanish | Korean | 23.74 (.01) | .049 (.023, .074) | .996 | 8.26 (.08) | .000 | 25.30 (.03) | .002 | 18.48 (.00) | .004 |
| Spanish | Mandarin | 31.19 (.01) | .049 (.030, .069) | .997 | 5.96 (.20) | .000 | 29.52 (.01) | .002 | 31.00 (.00) | .004 |
| Spanish | Punjabi | 19.26 (.04) | .035 (.008, .058) | .998 | 1.18 (.88) | .001 | 24.11 (.04) | .002 | 10.97 (.05) | .001 |
| French | Korean | 20.49 (.02) | .034 (.012, .055) | .998 | 1.71 (.79) | .001 | 22.91 (.06) | .001 | 29.42 (.00) | .006 |
| French | Mandarin | 28.21 (.00) | .039 (.022, .056) | .998 | 2.39 (.67) | .001 | 17.30 (.24) | .001 | 59.48 (.00) | .007 |
| French | Punjabi | 16.46 (.09) | .025 (.000, .045) | .999 | 5.58 (.23) | .000 | 26.81 (.02) | .002 | 12.29 (.03) | .002 |
| Korean | Mandarin | 34.09 (.00) | .054 (.035, .074) | .996 | 3.30 (.51) | .001 | 8.83 (.84) | .001 | 3.03 (.70) | .001 |
| Korean | Punjabi | 21.32 (.02) | .040 (.016, .064) | .997 | 7.18 (.13) | .001 | 21.37 (.09) | .002 | 43.74 (.00) | **.016** |
| Mandarin | Punjabi | 28.37 (.02) | .043 (.025, .062) | .997 | 3.55 (.47) | .001 | 21.32 (.09) | .001 | 74.28 (.00) | **.013** |

Bolded values indicate rejection of model fit (Δ CFI > .01). n/a = fit not assessed as previous level of MI not supported.
